# Supplementary material for: In situ analysis of reaction kinetics of reduction promotion of NiMn2O4under microwave H-field irradiation
Source: Royal Society of Chemistry journal article supplement (doi:10.1039/c7cp02728a), 2017-01-01
Supplement: c7cp02728a1.pdf [file c7cp02728a1.pdf]

Supplemental Information 1

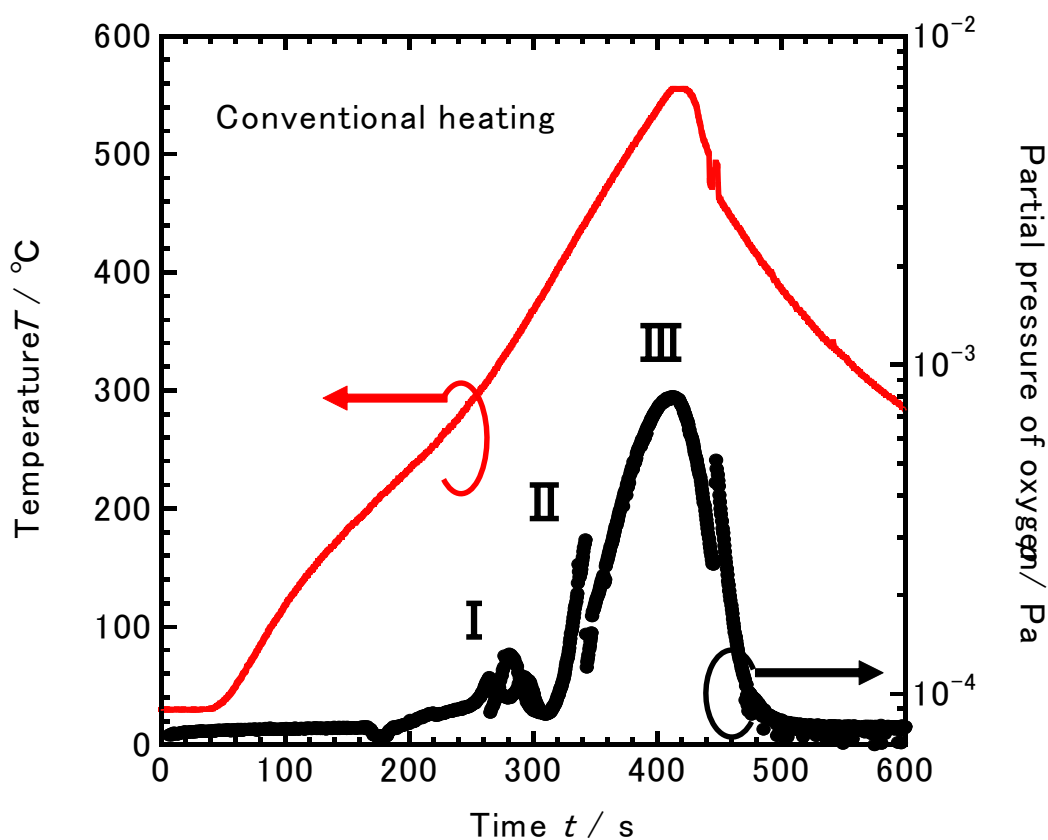

This figure shows the time dependence on temperature and partial pressure of oxygen when conventional heating. As you can see, the reduction reaction was intercepted around 340 s. In conventional heating, the sample temperature was increased up to 600 oC, resulting the peak III looks larger compared to that in microwave heating at 80 W.
